# Supplementary material for: Cortical microtubule pulling forces contribute to the union of the parental genomes in the Caenorhabditis elegans zygote
Source: eLife. 2022 Mar 8;11:e75382. doi: 10.7554/eLife.75382 (PMC8956289; doi:10.7554/eLife.75382)
Supplement: Figure 1—source data 1. [file elife-75382-fig1-data1.xlsx]

## Sheet: Figure 1D
Figure 1-source data 1.
	Quantification data related to Figure 1D.
	Steps of nuclear envelope breakdown: pronuclei permeabilization, lamina disassembly (at the poles, between pronuclei), chromosomes alignment and pronuclei envelope scission event (membrane gap).
Pronuclear permeabilization
Strain	mCherry::LMN-1; GFP::TBB-2								mCherry::NPP-22; GFP::TBB-2							MEAN	SD	SEM
Embryo	1	2	3	4	5	6	7	8	1	2	3	4	5	6	7
Time (sec)	-178	-156	-142	-144	-148	-170	-160	-148	-158	-164	-178	-148	-134	-142	-150	-154.667	13.2808	5.42188
Lamina depolymerization
	At the poles								between the pronuclei
Strain	mCherry::LMN-1; GFP::TBB-2																MEAN	SD	SEM
Embryo	1	2	3	4	5	6	7	8	1	2	3	4	5	6	7	8
Time (sec)	-64	-70	-54	-72	-80	-66	-70	-64	-44	-48	-46	-44	-62	-56	-54	-54	-58.9333	11.2088	4.57599
Chromosomes alignment
Strain	mCherry::HIS-58; GFP::TBB-2										MEAN	SD	SEM
Embryo	1	2	3	4	5	6	7	8	9	10
Time (sec)	-26	-28	-32	-32	-28	-30	-34	-30	-34	-28	-30.2	2.74064	1.11886
Membrane GAP
Strain	mCherry::NPP-22; GFP::TBB-2							MEAN	SD	SEM
Embryo	1	2	3	4	5	6	7
Time (sec)	-10	-28	-16	-36	-26	-2	-20	-19.7143	11.514	4.70056

## Sheet: Figure E
Figure 1-source data 1.
Quantification data related to Figure 1E.
The surface area occupied by the pronuclei expressing mCherry::LMN-1 starting 200s before anaphase onset (0s).
	Area (μm2)
	Embryos
Time (sec)	1	2	3	4	5	MEAN	SD	SEM
-200	120.68	102.92	119.29	120.62	126.87	118.076	8.96894	4.01103
-198	118.33	102.1	118.26	118.581	126.77	116.808	8.98798	4.01955
-196	116.6	100.25	117.07	119.338	126.56	115.964	9.64645	4.31402
-194	113.54	98.67	116.8	118.245	126.56	114.763	10.1971	4.56027
-192	110.78	100.63	114.06	118.097	126.16	113.945	9.40437	4.20576
-190	111.33	98.23	113.96	117.782	125.58	113.376	10.0285	4.48486
-188	112.59	96.15	113.38	118.392	125.39	113.18	10.8011	4.8304
-186	110.55	96.44	113.89	118.518	125.12	112.904	10.7042	4.78708
-184	110.26	96.23	113.9	117.656	125	112.609	10.6591	4.76689
-182	109.39	97.37	113.2	119.443	124.97	112.875	10.5129	4.70151
-180	107.82	96.5	112.13	117.53	124.83	111.762	10.6377	4.75732
-178	108.76	96.5	112.65	116.331	124.57	111.762	10.3399	4.62414
-176	105.59	95.9	110.41	117.425	124.01	110.667	10.8121	4.83532
-174	104.96	95.41	112.01	117.341	123.96	110.736	11.0495	4.94148
-172	102.77	93.69	109.4	118.16	123.84	109.572	11.9987	5.36597
-170	101.53	92.85	110.52	116.058	123.64	108.92	12.0732	5.39929
-168	99.93	89.61	111.06	115.848	123.59	108.008	13.3914	5.9888
-166	97.37	86.71	110.93	115.238	123.15	106.68	14.5606	6.51168
-164	97.07	85.36	109.48	113.577	123.07	105.711	14.716	6.5812
-162	97.2	84.94	109.61	114.733	122.9	105.877	14.965	6.69254
-160	98.48	83.6	108.607	116.521	122.64	105.969	15.4327	6.90171
-158	98.82	82.88	106.467	117.425	122.62	105.642	15.7513	7.04419
-156	97.45	84.23	103.44	117.004	122.61	104.947	15.3706	6.87396
-154	96.97	83.05	101.248	114.208	121.99	103.493	15.1859	6.79136
-152	94.86	81.09	98.0122	112.568	121.95	101.696	15.9164	7.11804
-150	90.39	80.76	98.7429	111.895	121.82	100.722	16.4249	7.34545
-148	87.67	80.36	97.0728	111.685	121.6	99.6775	16.9477	7.57925
-146	87.59	80.17	96.3421	110.949	120.82	99.1742	16.6625	7.45171
-144	87.02	79.69	95.5593	108.825	120.5	98.3189	16.4674	7.36446
-142	84.86	78.02	93.1064	106.492	120.45	96.5856	17.0434	7.62206
-140	84.69	77.79	88.5137	108.3	120.42	95.9427	17.7706	7.94723
-138	83.32	76.87	89.5575	107.291	119.27	95.2616	17.5677	7.85649
-136	84.42	76.05	87.8352	106.26	119.09	94.7311	17.5295	7.83944
-134	81.66	75.08	85.7476	105.167	118.3	93.1909	17.9601	8.03201
-132	81.6	73.61	86.1651	104.936	117.27	92.7162	17.9147	8.01168
-130	81.08	70.69	88.044	101.95	116.02	91.5568	17.7764	7.94984
-128	81.11	69.59	85.7998	101.677	115.91	90.8173	18.1492	8.11659
-126	81.74	68.75	84.8082	98.1026	114.05	89.4902	17.2446	7.71201
-124	82.75	67.26	85.1735	96.1473	112.92	88.8502	16.9519	7.58113
-122	81.07	67.57	84.3385	95.3694	109.36	87.5416	15.7188	7.02966
-120	81.35	66.5	84.1819	92.4049	107.73	86.4334	15.1448	6.77294
-118	80.09	66.33	82.3031	89.8819	107.45	85.211	15.0629	6.73633
-116	80.38	67.24	83.7122	85.8661	104.2	84.2797	13.278	5.93808
-114	80.34	66.73	83.1903	83.4903	96.5	82.0501	10.6043	4.74238
-112	80.83	64.99	81.21	83.3011	92.29	80.5242	9.84911	4.40466
-110	79.52	62.99	76.7	82.9436	90.62	78.5547	10.1423	4.53578
-108	79.62	65.2	73.51	83.8477	88.68	78.1715	9.14789	4.09106
-106	79.68	64.84	71.51	84.7308	88.18	77.7882	9.57652	4.28275
-104	77.22	64.02	75.13	82.7754	85.1	76.8491	8.22918	3.6802
-102	75.54	61.1	72.28	79.033	85.52	74.6946	9.04667	4.04579
-100	74.83	60.45	71.18	79.8319	84.85	74.2284	9.2698	4.14558
-98	73.94	62.04	73.27	75.3957	84.81	73.8911	8.09819	3.62162
-96	73.8	63.24	73.33	75.5849	81.74	73.539	6.66377	2.98013
-94	73.06	62.65	71.81	74.0921	80.59	72.4404	6.43773	2.87904
-92	73.12	61.98	66.4	73.4403	77.46	70.4801	6.19173	2.76902
-90	72.73	60.32	64.59	73.8188	77.17	69.7258	7.0007	3.13081
-88	71.53	60.47	65.12	72.7044	74.44	68.8529	5.86141	2.6213
-86	71.53	61.16	66.46	72.7255	74.18	69.2111	5.3574	2.3959
-84	71.8	58.13	63.74	71.6953	73.83	67.8391	6.66181	2.97925
-82	69.66	58.79	60.58	71.3799	72.36	66.554	6.37602	2.85144
-80	66.99	56.16	60.68	70.0132	69.4	64.6487	6.01339	2.68927

## Sheet: Figure 1F
Figure 1-source data 1.
Quantification data related to Figure 1F.
The intercentrosomal distance normalized to embryo length starting 80s before anaphase onset
in embryos expressing mCherry::LMN-1 or mCherry::NPP-22 and GFP::TBB-2.
	Intercentrosomal distance/embryo length x100 (%)
Strain	mCherry::LMN-1			mCherry::NPP-12
Time(sec)	MEAN	SEM	N	MEAN	SEM	N
-80	23.2338	1.3114	6	24.499	1.15224	6
-78	23.4743	1.25371	6	24.1992	1.20127	6
-76	24.4355	1.22253	6	24.3114	0.946155	6
-74	24.548	1.31267	6	24.2667	0.910859	6
-72	25.0691	1.35214	6	24.2145	0.925364	6
-70	25.1678	1.35102	6	24.3412	0.827857	6
-68	25.4253	1.40261	6	24.4775	0.817093	6
-66	25.5252	1.39715	6	24.5272	1.04328	6
-64	25.4128	1.42976	6	24.5173	1.05695	6
-62	25.359	1.48532	6	24.7647	1.01189	6
-60	25.2733	1.54305	6	24.9182	0.958718	6
-58	25.2837	1.61467	6	24.8521	0.981168	6
-56	25.3795	1.5259	6	24.6138	1.12595	6
-54	25.5803	1.4186	6	24.92	1.16208	6
-52	25.6191	1.54486	6	25.1739	1.16382	6
-50	25.769	1.41167	6	25.3635	1.09562	6
-48	26.0207	1.32011	6	25.5651	0.946904	6
-46	26.2278	1.40845	6	25.9088	0.79264	6
-44	26.4951	1.37703	6	25.4492	0.602527	6
-42	26.8097	1.43543	6	25.517	0.90068	6
-40	27.3819	1.27389	6	26.0358	0.983529	6
-38	26.9643	1.301	6	26.2176	0.864627	6
-36	27.4109	1.30424	6	26.3764	0.898435	6
-34	27.4743	1.23354	6	26.3963	0.785868	6
-32	27.3563	1.22427	6	26.8055	0.90931	6
-30	27.8963	1.21461	6	26.8551	0.805084	6
-28	28.0168	1.09136	6	26.8243	0.740125	6
-26	28.392	1.09838	6	26.8968	0.783235	6
-24	28.4965	0.984726	6	26.9465	0.735008	6
-22	28.7031	0.915699	6	27.2403	0.887975	6
-20	28.8156	0.900233	6	27.6335	0.797383	6
-18	28.9353	0.911711	6	27.8627	1.07138	6
-16	29.1735	1.0068	6	27.9505	0.878109	6
-14	29.2353	1.08455	6	28.6051	0.582453	6
-12	29.2499	1.07052	6	28.9086	0.554704	6
-10	29.7066	1.093	6	28.7785	0.593274	6
-8	30.0614	1.25565	6	29.1594	0.448633	6
-6	30.1829	1.5866	6	29.4546	0.453451	6
-4	30.9801	1.58003	6	29.4084	0.502841	6
-2	31.0066	1.49765	6	29.5738	0.671825	6
0	30.9679	1.49656	6	29.8885	0.796516	6
