# Supplementary material for: Cortical microtubule pulling forces contribute to the union of the parental genomes in the Caenorhabditis elegans zygote
Source: eLife. 2022 Mar 8;11:e75382. doi: 10.7554/eLife.75382 (PMC8956289; doi:10.7554/eLife.75382)
Supplement: Figure 2—figure supplement 1—source data 1. [file elife-75382-fig2-figsupp1-data1.xlsx]

## Sheet: Feuil1
Figure 2-figure supplement 1-source data 1.
Quantification data related to Figure 2-figure supplement 1
GFP::LMN-1 8A flourescence intensity during mitosis control vs mild gpr1/2(RNAi)
Time (sec)	GFP::LMN-1 8A
	ctrl(RNAi) n=7			gpr1/2(RNAi) n=10
	MEAN	SEM	N	MEAN	SEM	N
-120	1	0	7	1	0	10
-110	0.99118	0.01102	7	0.98141	0.00877	10
-100	0.96129	0.01335	7	0.93085	0.00817	10
-90	0.92757	0.02006	7	0.89873	0.01179	10
-80	0.89348	0.02302	7	0.89672	0.00852	10
-70	0.88943	0.02071	7	0.87	0.01776	10
-60	0.85331	0.02387	7	0.84862	0.01632	10
-50	0.85599	0.02113	7	0.84353	0.02141	10
-40	0.84563	0.01974	7	0.83516	0.0207	10
-30	0.82768	0.02244	7	0.8264	0.01927	10
-20	0.82522	0.02365	7	0.8017	0.02198	10
-10	0.80762	0.0185	7	0.79828	0.02416	10
0	0.77879	0.0227	7	0.79604	0.02771	10
10	0.79219	0.03421	7	0.75422	0.0271	10
20	0.72588	0.03531	7	0.74818	0.03201	10
30	0.72561	0.046	7	0.70405	0.02938	10
40	0.65105	0.0352	7	0.67353	0.03249	10
50	0.63411	0.04035	7	0.63402	0.03077	10
60	0.59322	0.03801	7	0.58441	0.02934	10
70	0.50172	0.05344	7	0.53785	0.02301	10
80	0.44784	0.04119	7	0.47058	0.02245	10
90	0.41399	0.04484	7	0.43808	0.01929	10
100	0.394073	0.0248321	7	0.412731	0.029516	10
