# Supplementary material for: Cortical microtubule pulling forces contribute to the union of the parental genomes in the Caenorhabditis elegans zygote
Source: eLife. 2022 Mar 8;11:e75382. doi: 10.7554/eLife.75382 (PMC8956289; doi:10.7554/eLife.75382)
Supplement: Figure 2—source data 1. [file elife-75382-fig2-data1.xlsx]

## Sheet: Figure 2A
Figure 2-source data 1.
Quantification data related to Figure 2A
Percentage of lmn-1∆ ; gfp::lmn-1 and lmn-1∆ ; gfp::lmn-1 8A embryos presenting 0 (green), 1 (orange) or 2 (red) paired nuclei
at the two-cell stage upon exposure to mock RNAi (ctrl) or gpr-1/2(RNAi) at 20°C
Strain	RNAi	Paired nuclei
		0	1	2
gfp::lmn-1	ctrl(RNAi)	27/27 (100%)	0/27 (0%)	0/27 (0%)
	mild gpr1/2(RNAi)	10/10 (100%)	0/10 (0%)	0/10 (0%)
	severe gpr1/2(RNAi)	49/54 (91%)	2/54 (4%)	3/54 (5%)
gfp::lmn-1 8A	ctrl(RNAi)	83/100 (83%)	9/100 (9%)	8/100 (8%)
	mild gpr1/2(RNAi)	18/83 (22%)	20/83 (24%)	45/83 (54%)
	severe gpr1/2(RNAi)	3/53 (6%)	6/53 (11%)	44/53 (83%)

## Sheet: Figure 2E
Figure 2-source data 1.
Quantification data related to Figure 2E
GFP::LMN-1 flourescence intensity during mitosis control vs severe gpr1/2(RNAi)
Time (sec)	GFP::LMN-1
	ctrl(RNAi) n=12			gpr1/2(RNAi) n=15
	MEAN	SEM	N	MEAN	SEM	N
-120	1	0	12	1	0	15
-110	0.922156	0.018552	12	0.925106	0.0196984	15
-100	0.881984	0.0183369	12	0.846546	0.024821	15
-90	0.811003	0.0189987	12	0.799925	0.0244773	15
-80	0.730095	0.020804	12	0.691496	0.022927	15
-70	0.628911	0.0252197	12	0.60115	0.0253428	15
-60	0.528246	0.0268354	12	0.469243	0.0255836	15
-50	0.415615	0.0279187	12	0.353125	0.0242252	15
-40	0.309963	0.0297869	12	0.258264	0.022788	15
-30	0.217827	0.0298321	12	0.16065	0.0199369	15
-20	0.13889	0.0265046	12	0.099857	0.015625	15
-10	0.0955684	0.0231721	12	0.0679569	0.0146422	15
0	0.0619501	0.0178228	12	0.051918	0.012939	15
10	0.0416763	0.0119173	12	0.0407076	0.0111292	15
20	0.0422418	0.012959	12	0.0390805	0.0112056	15
30	0.0380242	0.0122057	12	0.0314749	0.0115672	15
40	0.0378688	0.0125013	12	0.0335906	0.0113355	15
50	0.0368117	0.014953	12	0.0341477	0.010326	15
60	0.030907	0.0123936	12	0.033265	0.0111749	15
70	0.0343525	0.0134542	12	0.0304709	0.0104521	15
80	0.0381362	0.012318	12	0.0352161	0.0116094	15
90	0.0456045	0.0168383	12	0.0404058	0.0112849	15
100	0.0506213	0.014909	12	0.0463376	0.0124215	15

## Sheet: Figure 2F
Figure 2-source data 1.
Quantification data related to Figure 2F
GFP::LMN-1 8A flourescence intensity during mitosis control vs severe gpr1/2(RNAi) and klp-7(RNAi)
Time (sec)	GFP::LMN-1 8A
	ctrl(RNAi) n=13			gpr1/2(RNAi) n=9			klp-7(RNAi) n=9
	MEAN	SEM	N	MEAN	SEM	N	MEAN	SEM	N
-120	1	0	13	1	0	9	1	0	9
-110	0.969203	0.0185477	13	0.978972	0.017803	9	0.976578	0.0235987	9
-100	0.954353	0.0209674	13	0.957282	0.0225648	9	0.919688	0.031447	9
-90	0.94045	0.0239858	13	0.956845	0.0269659	9	0.916727	0.0277696	9
-80	0.920975	0.0258795	13	0.932245	0.0233606	9	0.89418	0.0336101	9
-70	0.896464	0.0209403	13	0.941148	0.0292725	9	0.868547	0.0274565	9
-60	0.90527	0.0256171	13	0.928399	0.0255175	9	0.811752	0.0320584	9
-50	0.891383	0.0248257	13	0.887622	0.0253958	9	0.801707	0.0298993	9
-40	0.896858	0.0267501	13	0.894294	0.0216662	9	0.780543	0.0319365	9
-30	0.856928	0.0229026	13	0.875255	0.0215607	9	0.751872	0.0279258	9
-20	0.869939	0.025981	13	0.890223	0.0222066	9	0.763312	0.0313739	9
-10	0.833134	0.0257595	13	0.859002	0.0242319	9	0.723789	0.0315942	9
0	0.806701	0.0269014	13	0.840888	0.0255864	9	0.727439	0.0322452	9
10	0.806552	0.030193	13	0.840544	0.02259	9	0.662097	0.0354661	9
20	0.721383	0.0260693	13	0.837408	0.0280433	9	0.632485	0.03507	9
30	0.746356	0.0297624	13	0.803718	0.0308495	9	0.64084	0.0301242	9
40	0.691544	0.0301103	13	0.771289	0.0354989	9	0.555112	0.0375175	9
50	0.676843	0.0304309	13	0.72388	0.041908	9	0.493239	0.0355918	9
60	0.604955	0.0335881	13	0.720999	0.0412176	9	0.465103	0.0365749	9
70	0.588629	0.0375569	13	0.68671	0.0413649	9	0.401037	0.0439862	9
80	0.52178	0.0361816	13	0.644847	0.0415749	9	0.3726	0.048757	9
90	0.463593	0.0339018	13	0.60682	0.0453848	9	0.313266	0.0480848	9
100	0.449857	0.0401523	13	0.562064	0.0456585	9	0.274687	0.0427515	9
