# Supplementary material for: Cortical microtubule pulling forces contribute to the union of the parental genomes in the Caenorhabditis elegans zygote
Source: eLife. 2022 Mar 8;11:e75382. doi: 10.7554/eLife.75382 (PMC8956289; doi:10.7554/eLife.75382)
Supplement: Figure 3—source data 1. [file elife-75382-fig3-data1.xlsx]

## Sheet: Figure 3C
Figure 3-source data 1.
Quantification data related to Figure 3C
Percentage of embryos presenting a pronuclear envelope scission event upon exposure to mock (control, ctrl) or gpr-1/2(RNAi).
Strain	RNAi	Membrane GAP	NO membrane GAP
gfp::lem-2	ctrl(RNAi)	32/32 (100%)	0/32 (0%)
	severe gpr1/2(RNAi)	4/30 (13%)	26/30 (87%)

## Sheet: Figure 3D
Figure 3-source data 1.
Quantification data related to Figure 3D
The intercentrosomal distance normalized to embryo length starting 80s before anaphase onset
in embryos expressing GFP::LEM-2 upon exposure to mock RNAi (ctrl) or gpr1/2(RNAi)
Intercentrosomal distance/embryo length x100 (%)
Time (sec)	GFP::LEM-2
	ctrl(RNAi) n=15			gpr1/2(RNAi) n=4			gpr1/2(RNAi) n=26
	MEAN	SEM	N	MEAN	SEM	N	MEAN	SEM	N
-80	23.3156	0.451228	15	22.0717	0.559947	4	21.369	0.476388	26
-70	23.686	0.440284	15	23.3161	0.36165	4	21.7913	0.491807	26
-60	24.3189	0.281526	15	23.4259	0.669243	4	22.0513	0.47644	26
-50	25.2898	0.370268	15	24.0039	0.626538	4	23.0707	0.468197	26
-40	26.1751	0.504966	15	24.633	0.578721	4	24.0501	0.459334	26
-30	27.1411	0.627207	15	25.0558	0.710789	4	25.0991	0.492999	26
-20	27.6502	0.663929	15	25.6598	0.618894	4	25.1782	0.443	26
-10	28.6922	0.766492	15	26.2854	0.765384	4	25.9746	0.469042	26
0	29.4511	0.826788	15	26.3787	0.790944	4	26.3919	0.489281	26
10	31.667	0.833143	15	26.5078	1.0672	4	27.3316	0.411	26
20	33.8703	0.977661	15	28.2233	1.03813	4	28.7091	0.434678	26
30	35.0876	1.00378	15	29.7722	1.37367	4	29.2351	0.558327	26
40	37.066	1.08398	15	30.6552	1.67497	4	30.4916	0.417503	26
50	37.9576	1.09577	15	31.1638	1.73721	4	31.4317	0.43573	26
60	39.6614	1.08928	15	32.7853	1.73585	4	32.2495	0.39689	26
70	40.6631	1.23875	15	33.6298	1.81631	4	32.9505	0.483059	26
80	41.5054	1.23494	15	33.6352	1.41481	4	33.7065	0.478785	26
90	42.8008	1.11214	15	34.8086	1.75211	4	34.458	0.526121	26
100	43.5753	1.14436	15	35.7873	1.59714	4	35.1777	0.5678	26
110	44.4215	1.03056	15	35.3948	1.36852	4	35.8084	0.524067	26
120	44.8626	1.03327	15	36.327	1.63197	4	36.312	0.544741	26
130	46.359	1.04675	15	37.4268	1.76142	4	36.6622	0.580679	26
140	46.9581	0.889028	15	37.9957	1.60737	4	36.9394	0.562222	26
150	47.5616	0.948014	15	38.1376	1.57739	4	37.1915	0.596006	26
160	48.1822	0.849533	15	38.7294	1.32927	4	37.5423	0.622932	26
170	48.9226	0.91316	15	38.9243	1.41931	4	37.9236	0.607045	26
180	49.3079	0.924995	15	39.7162	1.66873	4	38.1493	0.634944	26
190	49.6319	0.984998	15	40.3721	1.69732	4	37.7655	0.584143	26
200	50.4456	0.865677	15	41.0717	1.38426	4	38.2487	0.6439	26

## Sheet: Figure 3E
Figure 3-source data 1.
Quantification data related to Figure 3E
Percentage of lem-2 embryos presenting 0 (green), 1 (orange) or 2 (red) paired nuclei
at the two-cell stage upon exposure to mock RNAi (ctrl) or severe gpr-1/2(RNAi) at 20°C
Strain	RNAi	Paired nuclei
		0	1	2
gfp::lem-2	ctrl(RNAi)	32/32 (100%)	0/32 (0%)	0/32 (0%)
	severe gpr1/2(RNAi)	25/30 (84%)	2/30 (6%)	3/30 (10%)
