# Supplementary material for: Cortical microtubule pulling forces contribute to the union of the parental genomes in the Caenorhabditis elegans zygote
Source: eLife. 2022 Mar 8;11:e75382. doi: 10.7554/eLife.75382 (PMC8956289; doi:10.7554/eLife.75382)
Supplement: Figure 4—source data 1. [file elife-75382-fig4-data1.xlsx]

## Sheet: Figure 4B
Figure 4-source data 1.
Quantification data related to Figure 4B
Percentage of embryos presenting a pronuclear membrane scission event at different time intervals relative to anaphase onset.
Strain	RNAi	Time intervals at membrane GAP
		-120 to 80s	-70 to 40s	-30s to 0s
gfp::lem-2	ctrl(RNAi)	0/31 (0%)	0/31 (0%)	31/31 (100%)
	efa-6(RNAi)	2/33 (6%)	15/33 (45%)	16/33 (49%)
	klp-7(RNAi)	2/24 (8%)	9/24 (38%)	13/24 (54%)

## Sheet: Figure 4D
Figure 4-source data 1.
Quantification data related to Figure 4D
The intercentrosomal distance normalized to embryo length starting 80s before anaphase onset
in embryos expressing GFP::LEM-2 upon exposure to mock RNAi (ctrl), efa-6(RNAi) or klp-7(RNAi)
Intercentrosomal distance/embryo length x100 (%)
Time (sec)	GFP::LEM-2
	ctrl(RNAi) n=17			efa-6(RNAi) n=33			klp-7(RNAi) n=20
	MEAN	SEM	N	MEAN	SEM	N	MEAN	SEM	N
-80	21.4892	0.561927	17	22.5867	0.49843	33	24.7018	0.613013	20
-70	21.6362	0.531192	17	22.8567	0.57538	33	24.7249	0.631324	20
-60	22.269	0.512066	17	23.3356	0.494476	33	24.7344	0.679617	20
-50	23.2886	0.571618	17	24.0811	0.588339	33	24.5739	0.673342	20
-40	23.6385	0.558955	17	24.7207	0.539047	33	24.7121	0.685411	20
-30	25.0011	0.527917	17	25.5555	0.54979	33	24.952	0.617598	20
-20	25.9164	0.470641	17	26.4171	0.511601	33	25.1748	0.554505	20
-10	26.8811	0.502521	17	27.5611	0.506642	33	25.9389	0.52826	20
0	28.0213	0.538744	17	28.7774	0.624753	33	26.6321	0.678289	20
10	29.3163	0.525691	17	30.1299	0.655319	33	28.2538	0.754845	20
20	31.0389	0.600141	17	32.2063	0.602807	33	30.5062	0.784747	20
30	32.747	0.804779	17	34.5494	0.727656	33	34.2301	0.943273	20
40	34.7799	0.719816	17	36.5579	0.751376	33	37.1565	1.00107	20
50	36.5038	0.755708	17	38.7259	0.713419	33	40.1218	1.34107	20
60	37.4377	0.668779	17	40.3628	0.850931	33	42.2554	1.45731	20
70	38.6297	0.689348	17	41.7997	0.87949	33	44.3383	1.27339	20
80	40.072	0.718076	17	43.428	0.749449	33	45.6569	1.1148	20
90	41.5547	0.674561	17	44.5853	0.822719	33	46.7591	1.04897	20
100	42.7597	0.619719	17	45.4275	0.804408	33	47.6204	1.01428	20
110	43.4143	0.551194	17	46.736	0.770115	33	48.806	0.893451	20
120	44.5789	0.653034	17	47.4857	0.763783	33	49.5858	0.776309	20
130	45.4488	0.601939	17	47.9577	0.802372	33	50.1528	0.769463	20
140	46.1326	0.572858	17	48.9029	0.812694	33	50.7697	0.705827	20
150	46.7987	0.586782	17	49.5349	0.799373	33	51.0718	0.655986	20
160	47.6752	0.592652	17	49.7093	0.815715	33	51.3383	0.656702	20
170	48.2551	0.575069	17	50.0176	0.896027	33	51.52	0.645951	20
180	48.8086	0.593527	17	50.3832	0.887807	33	51.7386	0.697488	20
190	49.2389	0.621621	17	50.3933	0.867044	33	52.0271	0.720912	20
200	49.452	0.613315	17	50.8785	0.887307	33	52.2382	0.653079	20

## Sheet: Figure 4E
Figure 4-source data 1.
Quantification data related to Figure 4E
The intercentrosomal distance normalized to embryo length in percentage at the time of pronuclei membrane gap formation
in embryos expressing GFP::LEM-2 upon exposure to mock RNAi (ctrl), efa-6(RNAi) or klp-7(RNAi)
Intercentrosomal distance/embryo length x100 (%) at membrane GAP
Strain	GFP::LEM-2
Embryo	ctrl(RNAi)	efa-6(RNAi)	klp-7(RNAi)
1	27.4539	24.9153	24.3032
2	23.3928	24.4176	26.2651
3	27.3352	26.0293	28.9858
4	20.5914	26.6338	21.4357
5	28.1167	26.4736	28.7141
6	29.3725	25.662	27.0103
7	26.0809	23.8756	25.4211
8	25.9193	25.072	24.1275
9	26.5218	28.86	28.4572
10	25.8143	30.5332	25.633
11	24.1988	28.6015	25.8976
12	25.0015	22.5599	23.8828
13	26.3402	29.3357	21.0503
14	22.3702	26.2438	23.0804
15	21.8309	28.8209	24.2094
16	27.3512	30.218	28.2255
17	23.6963	25.8554	23.666
18	27.2455	22.8758	24.2997
19	24.428	25.9926	27.813
20	26.2793	24.4237	21.47
21	30.1135	23.5356	29.0243
22	27.5717	23.9891	28.7385
23	26.8308	19.9963	32.5714
24	29.0011	28.5663	29.5308
25	31.9633	29.0903
26	26.9269	21.3615
27	26.778	23.8345
28	29.5557	18.28
29	28.8108	18.9493
30	24.16	22.689
31	25.397	25.612
32		23.401
33		26.438
MEAN	26.3371	25.2467	25.9922
SD	2.51099	3.07956	2.95779
SEM	0.450987	0.536083	0.603756
N	31	33	24
	ctrl(RNAi) vs efa-6(RNAi)	ctrl(RNAi) vs klp-7(RNAi)	efa-6(RNAi) vs klp-7(RNAi)
Mann Whitney test
P value	0.1165	0.5958	0.5262
Exact or approximate P value?	Exact	Exact	Exact
P value summary	ns	ns	ns
Significantly different (P < 0.05)?	No	No	No
One- or two-tailed P value?	Two-tailed	Two-tailed	Two-tailed
Sum of ranks in column A,B	1125 , 955	900 , 640	917 , 736
Mann-Whitney U	394	340	356
