# Supplementary material for: Cortical microtubule pulling forces contribute to the union of the parental genomes in the Caenorhabditis elegans zygote
Source: eLife. 2022 Mar 8;11:e75382. doi: 10.7554/eLife.75382 (PMC8956289; doi:10.7554/eLife.75382)
Supplement: Figure 5—source data 1. [file elife-75382-fig5-data1.xlsx]

## Sheet: Figure 5A
Figure 5-source data 1.
Quantification data related to Figure 5A
The intercentrosomal distance normalized to embryo length starting 80s before anaphase onset
in lmn-1 wt or lmn-1 8A embryos expressing GFP::LEM-2
Intercentrosomal distance/embryo length x100 (%)
Time (sec)	GFP::LEM-2
	lmn-1 wt n=14			lmn-1 8A n=14
	MEAN	SEM	N	MEAN	SEM	N
-80	23.3156	0.451228	14	22.1264	0.742972	14
-70	23.686	0.440284	14	22.1386	0.728438	14
-60	24.3189	0.281526	14	22.1687	0.842588	14
-50	25.2898	0.370268	14	22.6042	0.842468	14
-40	26.1751	0.504966	14	23.3896	0.879737	14
-30	27.1411	0.627207	14	23.7113	0.943945	14
-20	27.6502	0.663929	14	24.2319	0.862427	14
-10	28.6922	0.766492	14	25.397	0.861199	14
0	29.4511	0.826788	14	26.2267	0.854904	14
10	31.667	0.833143	14	27.5303	0.799973	14
20	33.8703	0.977661	14	29.4917	0.786241	14
30	35.0876	1.00378	14	30.9143	0.77224	14
40	37.066	1.08398	14	32.9591	0.810254	14
50	37.9576	1.09577	14	34.1828	0.7477	14
60	39.6614	1.08928	14	35.0202	0.70644	14
70	40.6631	1.23875	14	36.236	0.751182	14
80	41.5054	1.23494	14	37.8214	0.829701	14
90	42.8008	1.11214	14	38.8327	0.913527	14
100	43.5753	1.14436	14	39.523	0.818869	14
110	44.4215	1.03056	14	40.8623	0.80566	14
120	44.8626	1.03327	14	41.7112	0.86657	14
130	46.359	1.04675	14	42.4485	0.828434	14
140	46.9581	0.889028	14	43.0819	0.822189	14
150	47.5616	0.948014	14	43.5527	0.852045	14
160	48.1822	0.849533	14	44.317	0.838488	14
170	48.9226	0.91316	14	44.8789	0.858238	14
180	49.3079	0.924995	14	45.1636	0.772725	14
190	49.6319	0.984998	14	45.5297	0.696498	14
200	50.4456	0.865677	14	45.9602	0.717785	14

## Sheet: Figure 5B
Figure 5-source data 1.
Quantification data related to Figure 5B
The intercentrosomal distance in lmn-1 8A embryos expressing
GFP::LEM-2 upon exposure to mock RNAi (ctrl) or klp-7(RNAi)
Intercentrosomal distance/embryo length x100 (%)
Time (sec)	lmn-1 8A; GFP::LEM-2
	ctrl(RNAi) n=10			klp-7(RNAi) n=10
	MEAN	SEM	N	MEAN	SEM	N
-80	22.2784	0.829974	10	24.6288	0.467907	10
-70	22.0977	0.785837	10	24.9073	0.469967	10
-60	22.942	0.859928	10	24.9346	0.410953	10
-50	23.4843	0.92715	10	25.4261	0.460424	10
-40	24.1455	0.923107	10	25.3411	0.454969	10
-30	24.7416	0.980234	10	25.7379	0.579148	10
-20	25.5513	0.991512	10	25.9155	0.614134	10
-10	26.2013	0.910813	10	26.1388	0.611816	10
0	26.7801	0.969001	10	26.6391	0.642706	10
10	28.6698	1.04731	10	28.137	0.62308	10
20	30.2535	0.935029	10	30.8657	0.780654	10
30	32.4307	1.07229	10	33.0514	0.743428	10
40	33.5751	1.09931	10	35.4227	0.619202	10
50	34.7257	1.15397	10	36.6904	0.643532	10
60	36.1977	1.21246	10	39.4396	0.593968	10
70	37.4888	1.09338	10	41.1187	0.568584	10
80	39.1789	1.13741	10	42.5073	0.759911	10
90	40.4105	1.1385	10	43.2588	0.842684	10
100	41.5487	1.06705	10	44.2844	0.932699	10
110	42.2081	0.895368	10	45.0413	0.728316	10
120	43.6995	1.00813	10	45.6708	0.6263	10
130	44.1505	0.817587	10	46.8298	0.801729	10
140	45.0133	0.781588	10	47.1978	0.750654	10
150	45.3109	0.891481	10	47.7326	0.800854	10
160	46.2283	0.781844	10	48.4666	0.711966	10
170	46.6282	0.705172	10	48.678	0.735942	10
180	47.0758	0.694976	10	49.2497	0.687224	10
190	47.4096	0.690886	10	49.6738	0.592244	10
200	47.7566	0.623198	10	50.0435	0.686127	10

## Sheet: Figure 5E
Figure 5-source data 1.
Quantification data related to Figure 5D
Percentage of lmn-1 8A embryos presenting 0 (green), 1 (orange) or 2 (red) paired nuclei
at the two-cell stage upon exposure to mock RNAi (ctrl) or klp-7(RNAi)
Strain	RNAi	Paired nuclei
		0	1	2
gfp::lem-2; lmn-1 8A	ctrl(RNAi)	9/29 (31%)	9/29 (31%)	11/29 (38%)
	klp-7(RNAi)	6/20 (30%)	9/20 (45%)	5/20 (25%)
