# Supplementary material for: Cortical microtubule pulling forces contribute to the union of the parental genomes in the Caenorhabditis elegans zygote
Source: eLife. 2022 Mar 8;11:e75382. doi: 10.7554/eLife.75382 (PMC8956289; doi:10.7554/eLife.75382)
Supplement: Figure 6—source data 1. [file elife-75382-fig6-data1.xlsx]

## Sheet: Figure 6C
Figure 6-source data 1.
Quantification data related to Figure 6C
Percentage of plk-1(or683ts) embryos, expressing GFP::LEM-2 and mCherry::EMR-1 presenting 0 (green), 1 (orange) or 2 (red) paired nuclei
at the two-cell stage upon exposure to mock RNAi (ctrl) or lmn-1(RNAi)
Strain	RNAi	Paired nuclei
		0	1	2
plk-1(or683ts); gfp::lem-2; mCherry-emr-1	ctrl(RNAi)	2/35 (6%)	8/35 (23%)	25/35 (71%)
	lmn-1(RNAi)	18/20 (92%)	1/20 (4%)	1/24 (4%)
